# Supplementary material
Source: publisher figshare collection journal article supplement (https://acs.figshare.com/ndownloader/files/21007467)
Supplement: Supplementary file 1 [file 21007467]

## SUPPORTING INFORMATION

### Effect of Cu(II) on Mn(II) Oxidation by Free Chlorine to Form Mn Oxides at Drinking

#### Water Conditions

Guiwei Li,<sup>†,‡,§</sup> Weiyi Pan,<sup>‡</sup> Lili Zhang,<sup>†</sup> Ziqiao Wang,<sup>†</sup> Baoyou Shi<sup>†,§</sup>

and Daniel E. Giammar<sup>\*,‡</sup>

<sup>†</sup>Key Laboratory of Drinking Water Science and Technology, Research Center for Eco-Environmental Sciences, Chinese Academy of Sciences, Beijing 100085, China

<sup>‡</sup>Department of Energy, Environmental and Chemical Engineering, Washington University in St. Louis, St. Louis, Missouri 63130, United States

<sup>§</sup>University of Chinese Academy of Sciences, Beijing 100049, China

\*Corresponding author.

E-mail address: [giammar@wustl.edu](mailto:giammar@wustl.edu)

Prepared January 11, 2020

**This file includes supplementary text and figures:**

- 17 pages

- 14 Figures

## Table of contents

|                                                                                                 |     |
|-------------------------------------------------------------------------------------------------|-----|
| Sample preparation for SEM and TEM                                                              | S3  |
| Figure S1. Species of dissolved Mn(II), free chlorine and solubility of Mn minerals             | S4  |
| Figure S2. The calculated concentrations of DIC in equilibrium with atmospheric CO <sub>2</sub> | S5  |
| Figure S3. Mn(II) oxidation in Cu-free system                                                   | S5  |
| Figure S4. Cu(II) concentration change in a system without Mn                                   | .S7 |
| Figure S5. Species of dissolved Cu(II) and solubility of Cu minerals                            | S8  |
| Figure S6. Decrease of dissolved Cu(II) concentration during Mn(II) oxidation                   | S9  |
| Figure S7. SEM images of MnO <sub>x</sub> formed in Cu(II)-containing system                    | S10 |
| Figure S8. EDS analysis of MnO <sub>x</sub> -Cu(II)                                             | S11 |
| Figure S9. TEM images and zeta potential of MnO <sub>x</sub> in Cu-free system                  | S12 |
| Figure S10. Comparison of dissolved Mn(II) defined by 0.22 µm and 10 kDa filters                | S13 |
| Figure S11. Zeta potential of MnO <sub>x</sub> formed in Cu(II)-containing system               | S14 |
| Figure S12. SEM-EDS analysis of Mn formed in CuO-containing system                              | S15 |
| Figure S13. Temperature effect on Mn(II) oxidation catalyzed by Cu(II) and CuO                  | S16 |
| Figure S14. Effect of TBA on Mn(II) oxidation with Cu(II) present                               | S17 |

**TEM (transmission electron microscopy) sample preparation.** Transmission electron microscopy (TEM) was used to visualize particle size. During the oxidation of Mn(II), 10  $\mu$ L of the MnO<sub>x</sub>-containing suspension was placed on a carbon-coated copper grid and then dried at room temperature.

**SEM (scanning electron microscope) sample preparation.** As the oxidation of Mn(II) could be greatly affected by its initial concentration, a dose of Mn(II) of 100  $\mu$ g/L was adopted in all the experiments of this study. This is a typical regulatory level of Mn in finished water as well as a typical concentration of Mn found in drinking water distribution systems. As a result, it could be very challenging to collect particles from water samples for the characterization of Mn(II) oxidation products. However, it was found that after Mn(II) oxidation, there were some fine Mn particles deposited on the surface of stir bars used for water mixing. Particles were collected carefully from the stirrer bar for SEM characterization: the stir bar was first immersed in ethyl alcohol and sonicated to disperse Mn oxides; one drop of the MnO<sub>x</sub>-containing alcohol was then placed on a silica wafer, and the alcohol evaporated before the sample was taken to the SEM for characterization.

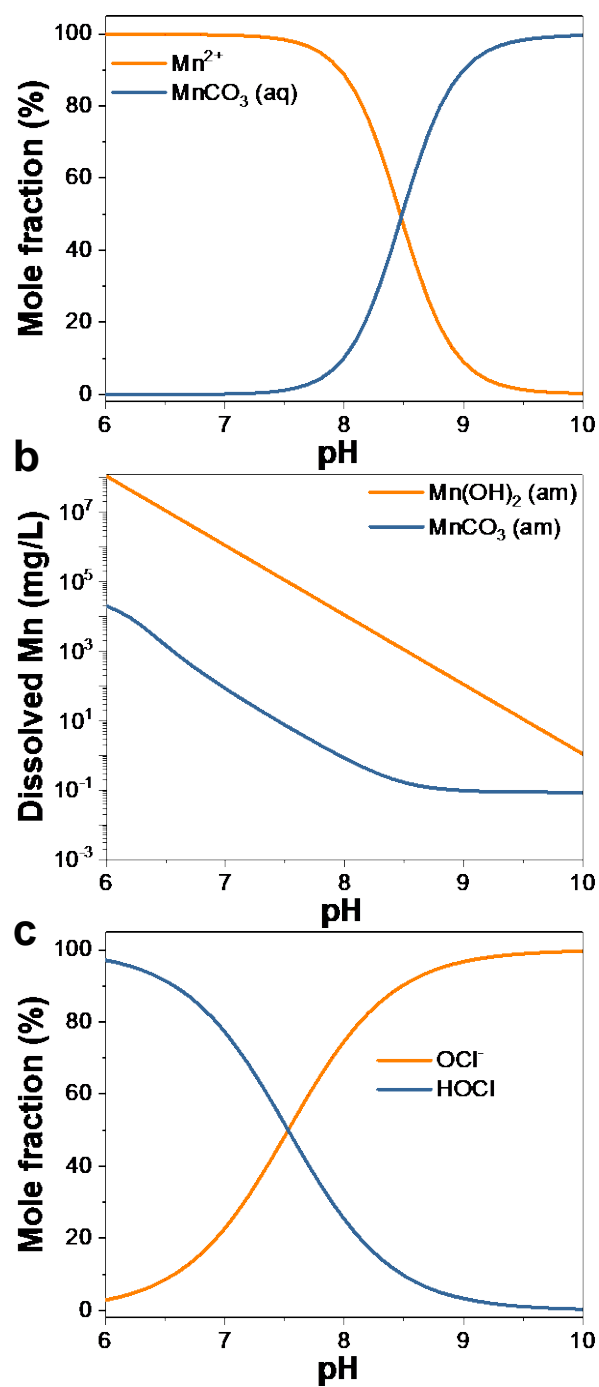

**Figure S1.** (a) Speciation of dissolved Mn(II) (100  $\mu\text{g/L}$ ) in an open system with DIC in equilibrium with atmospheric  $\text{CO}_2$  at 25  $^\circ\text{C}$ . (b) Solubility of  $\text{MnCO}_3$  with DIC in equilibrium with atmospheric  $\text{CO}_2$  at 25  $^\circ\text{C}$ , and the solubility of  $\text{Mn(OH)}_2$  without DIC at 25  $^\circ\text{C}$ . (c) Speciation of free chlorine ( $\text{HOCl} + \text{OCl}^-$ ) with different pH. Visual MINTEQ 3.1 was used for the calculation.

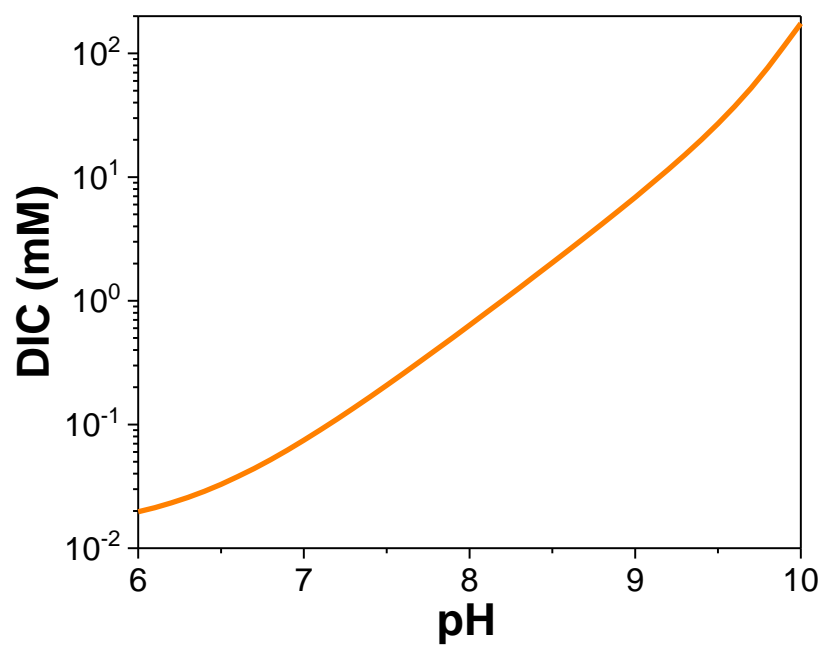

Figure S2. Concentrations of DIC in equilibrium with atmospheric CO<sub>2</sub> calculated by Visual MINTEQ3.1, based on a CO<sub>2</sub> partial pressure of 400 ppm.

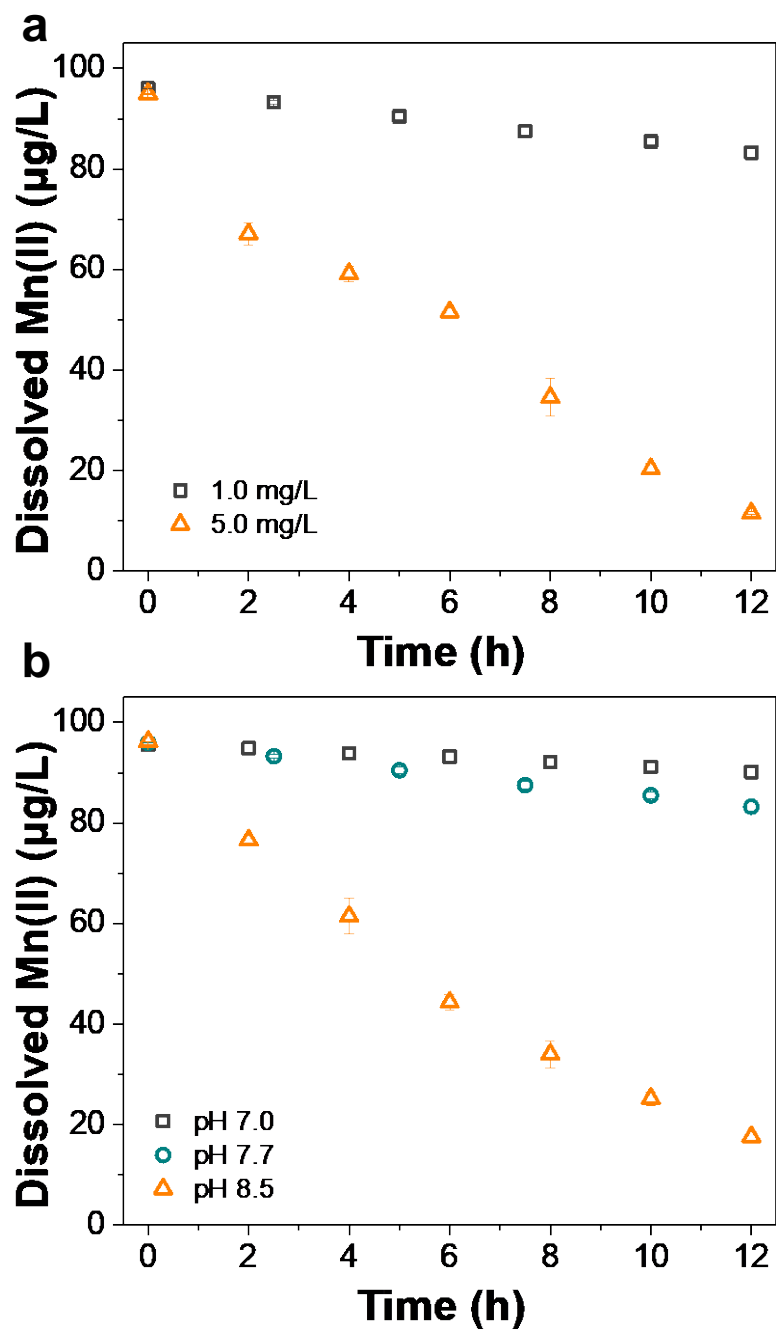

**Figure S3.** Oxidation of 100  $\mu\text{g/L}$  (1.82  $\mu\text{M}$ ) Mn(II) (a) by different concentrations of chlorine at pH  $7.7 \pm 0.1$  and (b) by 1.0 mg/L  $\text{Cl}_2$  (14.1  $\mu\text{M}$ ) at different pH. Other experimental conditions: NaCl = 1.0 mM, open to air. The error bars are the standard deviations of duplicate experiments.

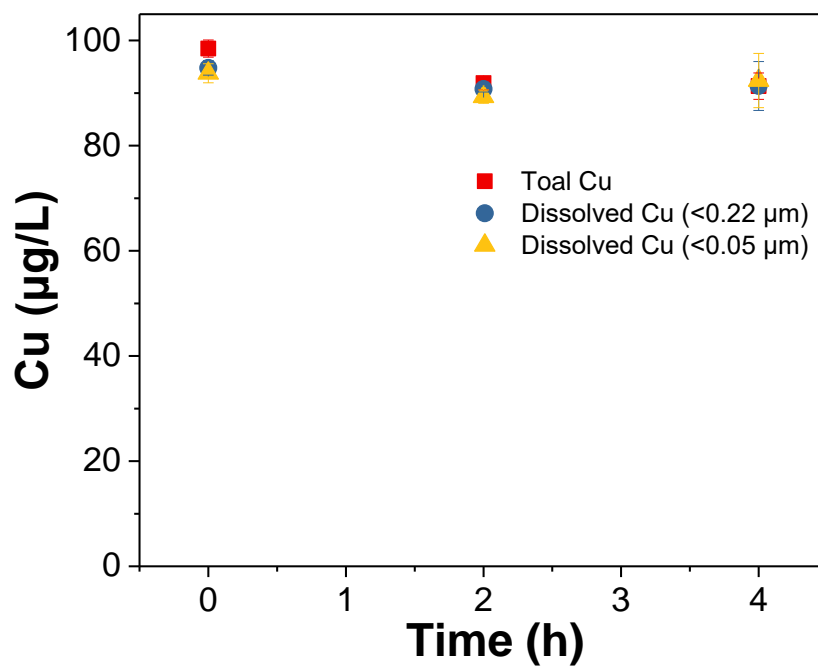

**Figure S4.** Concentration of dissolved Cu(II) in solutions without Mn(II) or chlorine present. Experimental conditions: NaCl = 1.0 mM, pH =  $7.7 \pm 0.1$ , open to air. The error bars are the standard deviations of duplicate experiments.

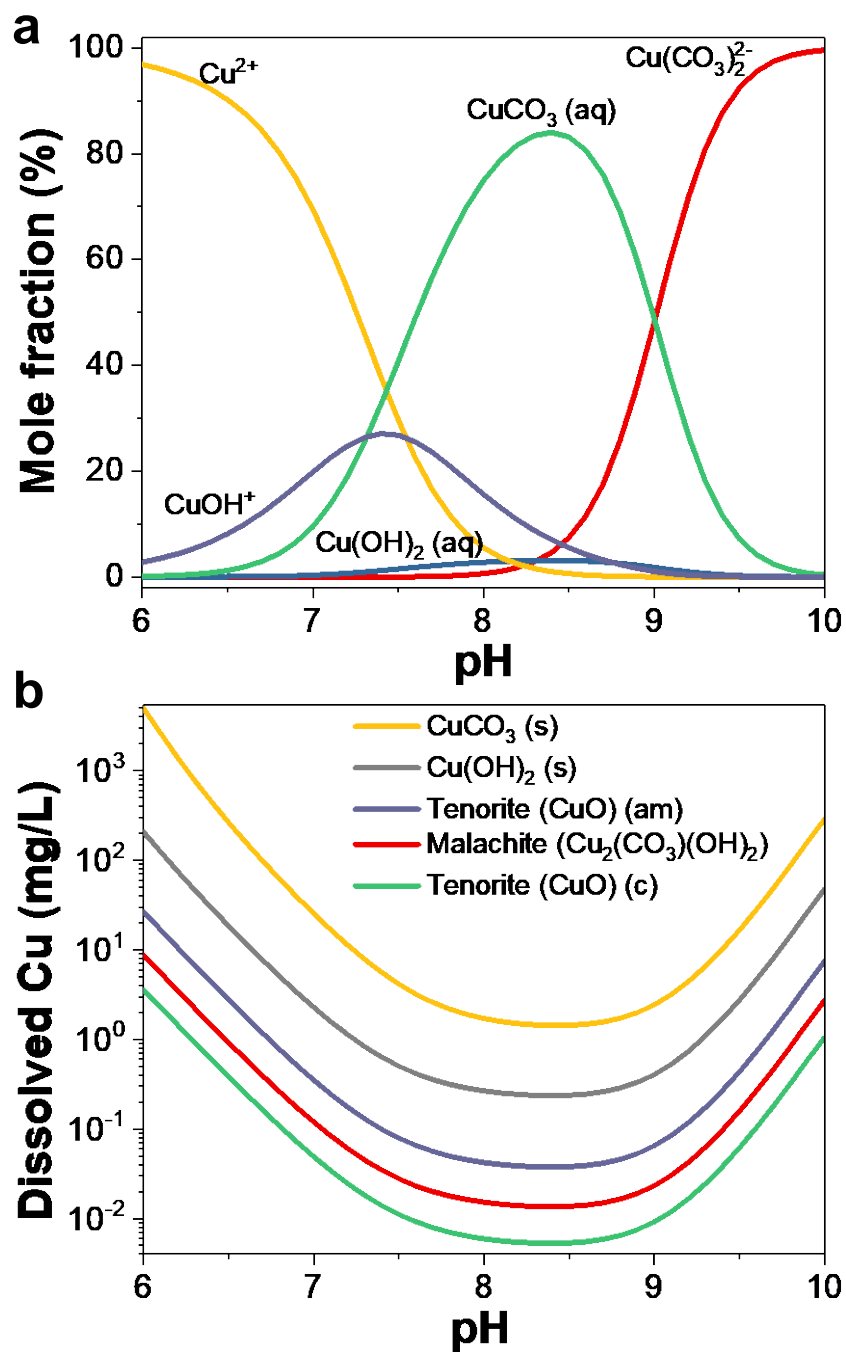

**Figure S5.** (a) Solubility of Cu(II) minerals and (b) dissolved species of Cu(II) (100  $\mu\text{g/L}$ ) at pH ranging from 6.0 to 10.0.  $T = 25^\circ\text{C}$ ,  $\text{NaCl} = 1.0 \text{ mM}$ , DIC in equilibrium with atmosphere at pH ranging from 6.0 to 9.0. The calculations were performed using Visual MINTEQ 3.1.



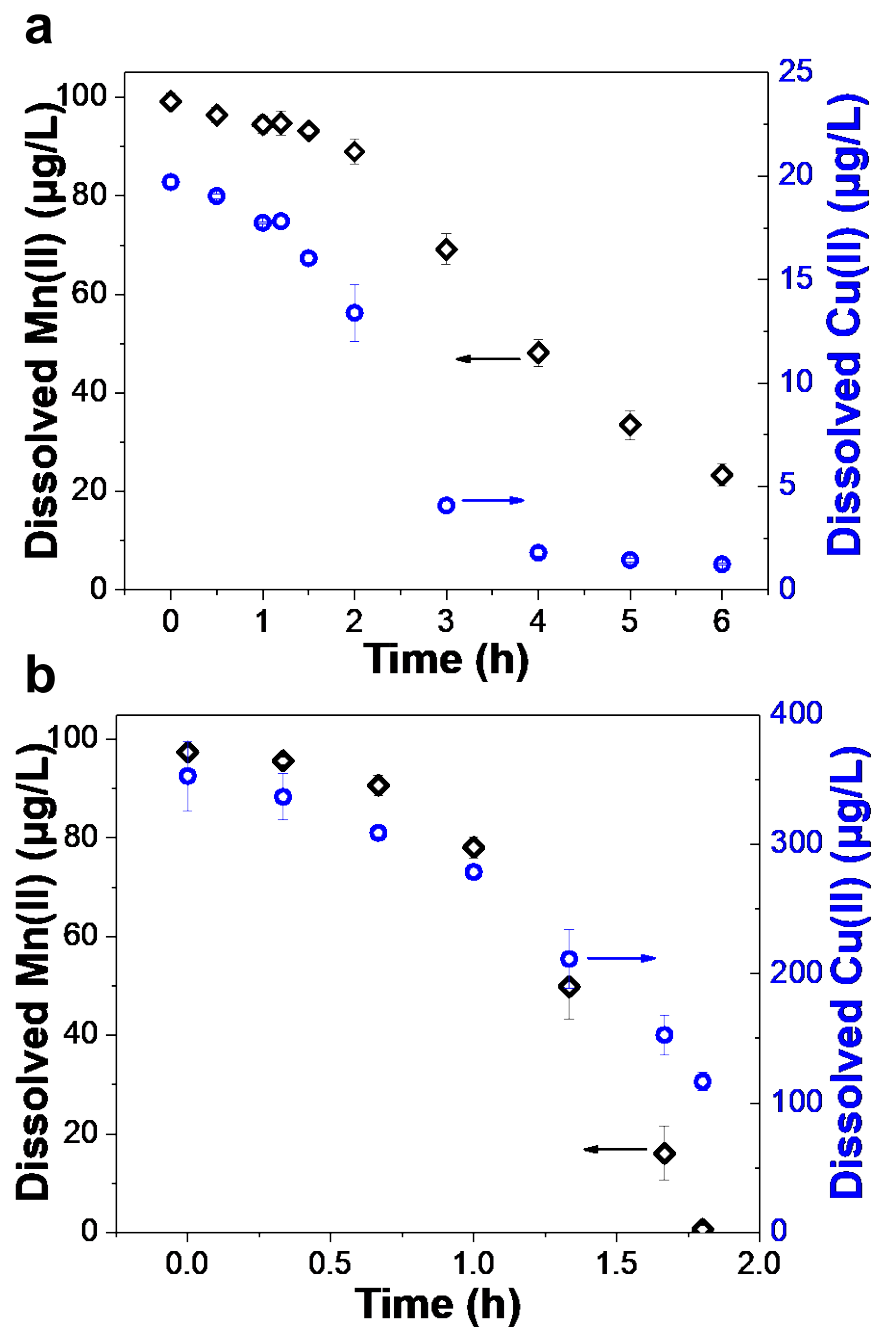

**Figure S6.** Decrease of dissolved Cu(II) and Mn(II) concentrations during the oxidation of Mn(II) by free chlorine: (a) initial Cu(II) dose = 20  $\mu\text{g/L}$ , (b) initial Cu(II) dose = 400  $\mu\text{g/L}$ . Experimental conditions: NaCl = 1.0 mM,  $\text{Cl}_2$  = 1.0 mg/L, pH =  $7.7 \pm 0.1$ , open to air. The error bars are the standard deviations of duplicate experiments.

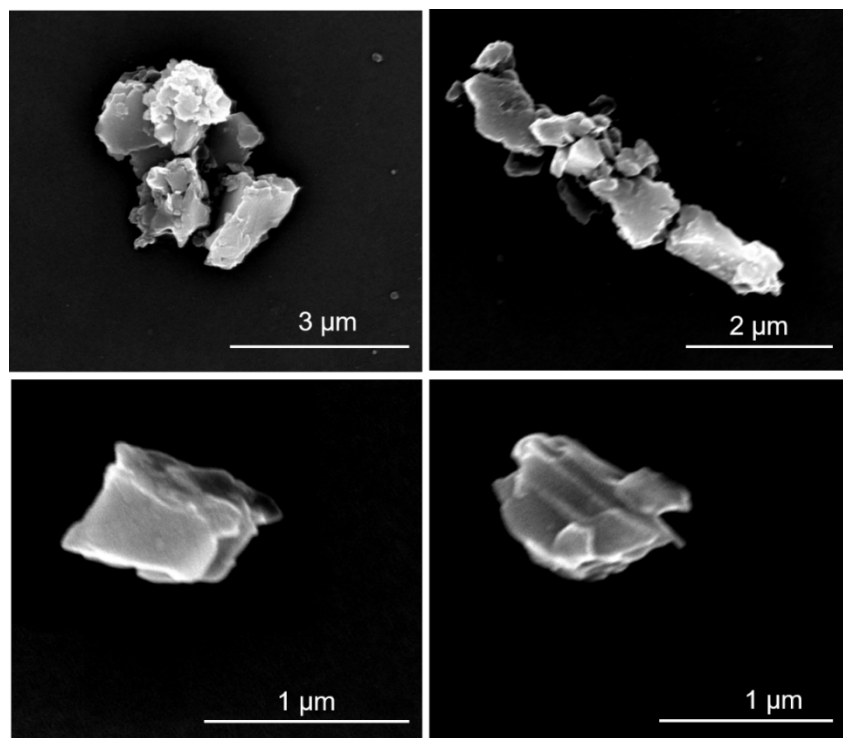

**Figure S7.** SEM images of MnO<sub>x</sub> particles formed from the Mn(II) oxidation in the presence of dissolved Cu(II). Experimental conditions: NaCl = 1.0 mM, Mn(II) = 100 μg/L, Cu(II) (added in the form of CuSO<sub>4</sub>) = 100 μg/L, pH = 7.7 ± 0.1, open to air; reaction proceeded for 4 hours. Four images were collected to make them more representative and they were all for the same batch of solid sample.

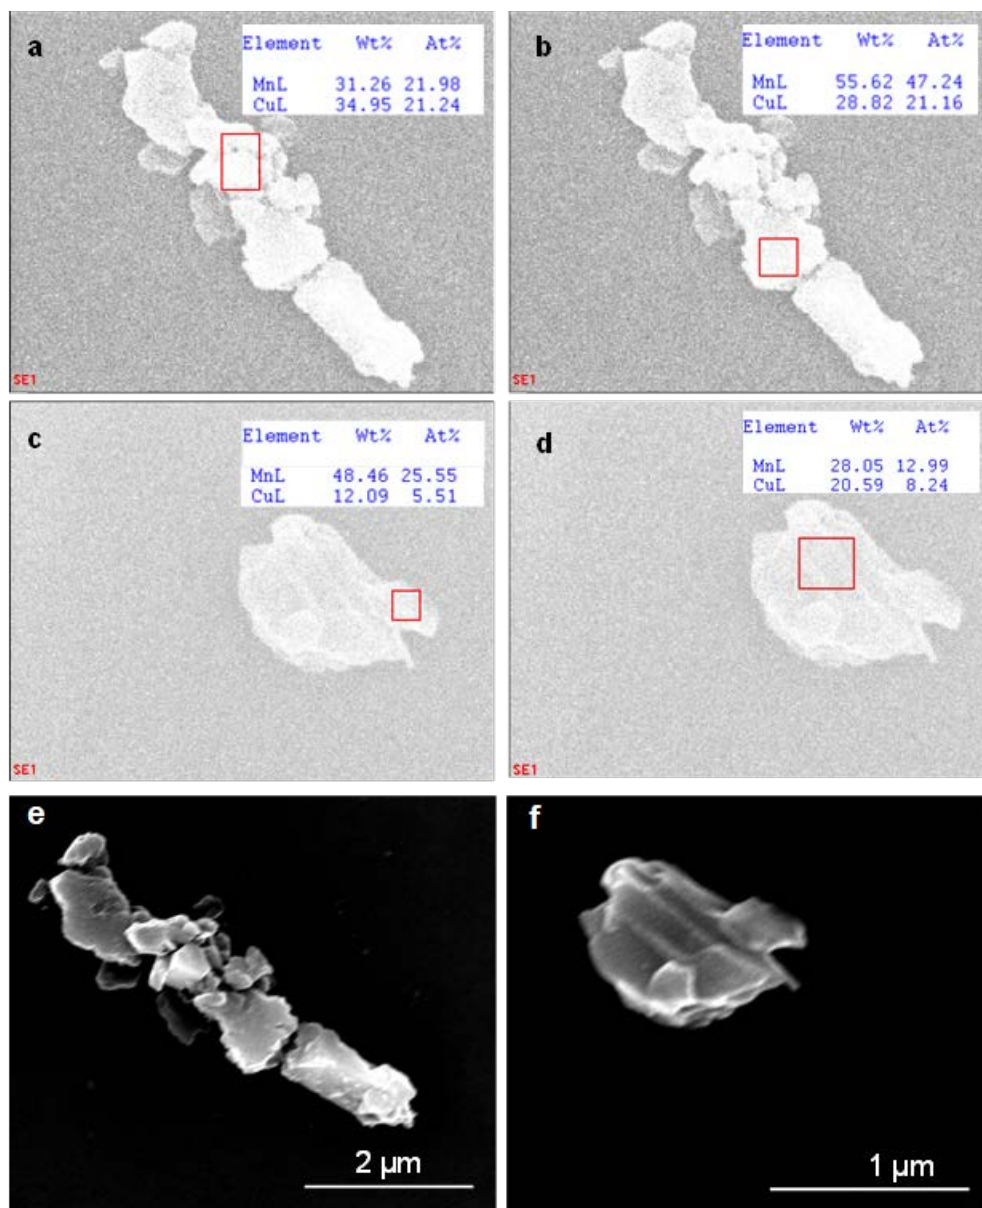

**Figure S8.** (a) and (b), Mn and Cu contents detected by EDS at two locations on the surface of MnO<sub>x</sub>-Cu(II) particle\_1; (c) and (d), Mn and Cu contents detected by EDS at two locations on the surface of MnO<sub>x</sub>-Cu(II) particle\_2. (e) and (f) are for clearer viewing of MnO<sub>x</sub> particulates.

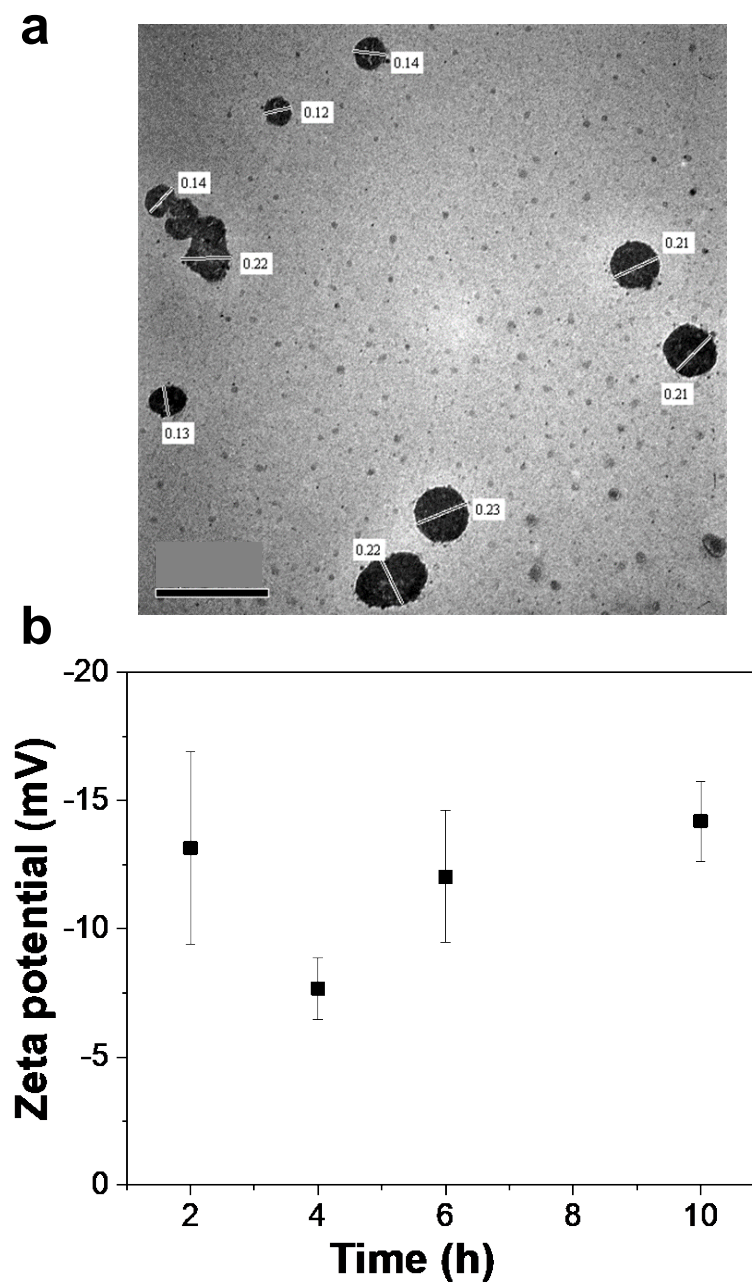

**Figure S9.** (a) TEM image and (b) zeta potential of the MnO<sub>x</sub> particulates formed from the oxidation of Mn(II) by 5.0 mg/L Cl<sub>2</sub>. Other experimental conditions: NaCl = 1.0 mM, Mn(II) = 100 µg/L, pH = 7.7 ± 0.1, open to air. The error bars are the standard deviations of triplicate measurements. The lines and numbers in (a) show the diameters of particles.

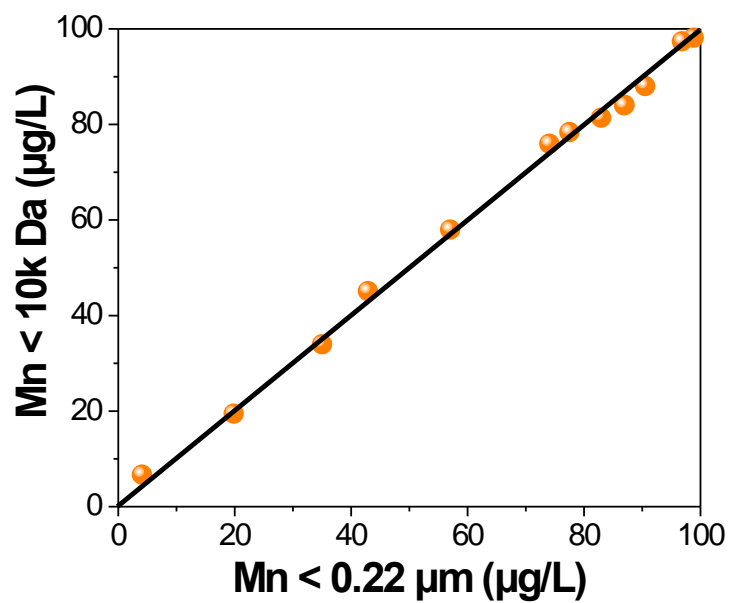

**Figure S10.** Comparison of Mn that passes through a 0.22 µm -filter and a 10k Da -filter in the Cu(II)-containing system. The solid line with a slope of 1 was drawn to indicate that the dissolved Mn(II) concentrations defined by the two kinds of filters were the same. Experimental conditions: NaCl = 1.0 mM, Mn(II) = 100 µg/L, Cu(II) = 100 µg/L, pH = 7.7 ± 0.1, open to air.

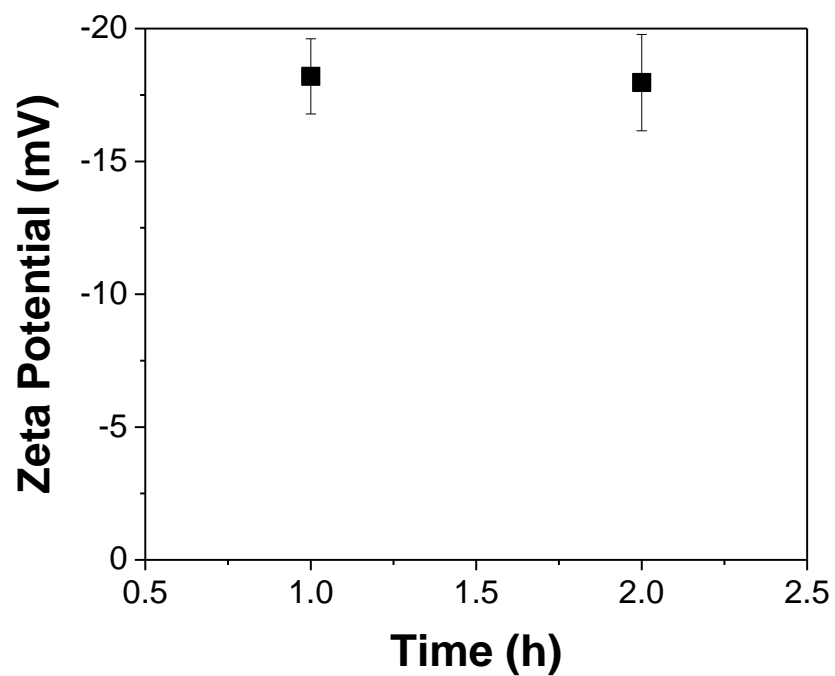

**Figure S11.** Zeta potential of Mn particles ( $\text{MnO}_x\text{-Cu(II)}$ ) formed through Mn(II) oxidation in the system containing 100  $\mu\text{g/L}$  Cu(II). Other experimental conditions: NaCl = 1.0 mM, Mn(II) = 100  $\mu\text{g/L}$ , pH =  $7.7 \pm 0.1$ ,  $\text{Cl}_2$  = 1.0 mg/L, open to air. The error bars are the standard deviations of triplicate measurements.

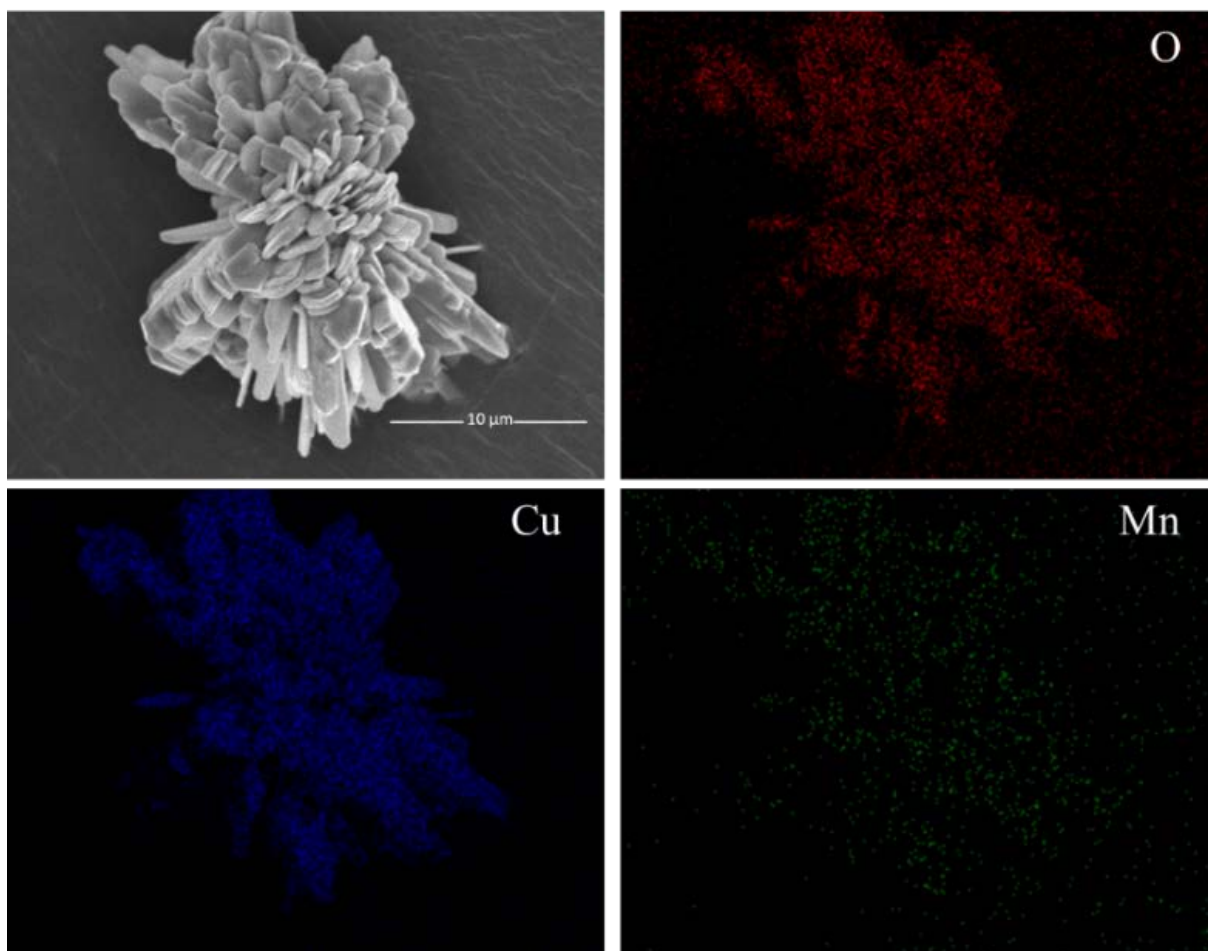

**Figure S12.** SEM image and EDS mapping of CuO particles collected after Mn(II) oxidation (reaction proceeded for 3 hours). Experimental conditions: NaCl = 1.0 mM, Cl<sub>2</sub> = 1.0 mg/L, CuO = 100 mg/L, Mn(II) = 100 μg/L, pH = 7.7 ± 0.1, open to air.

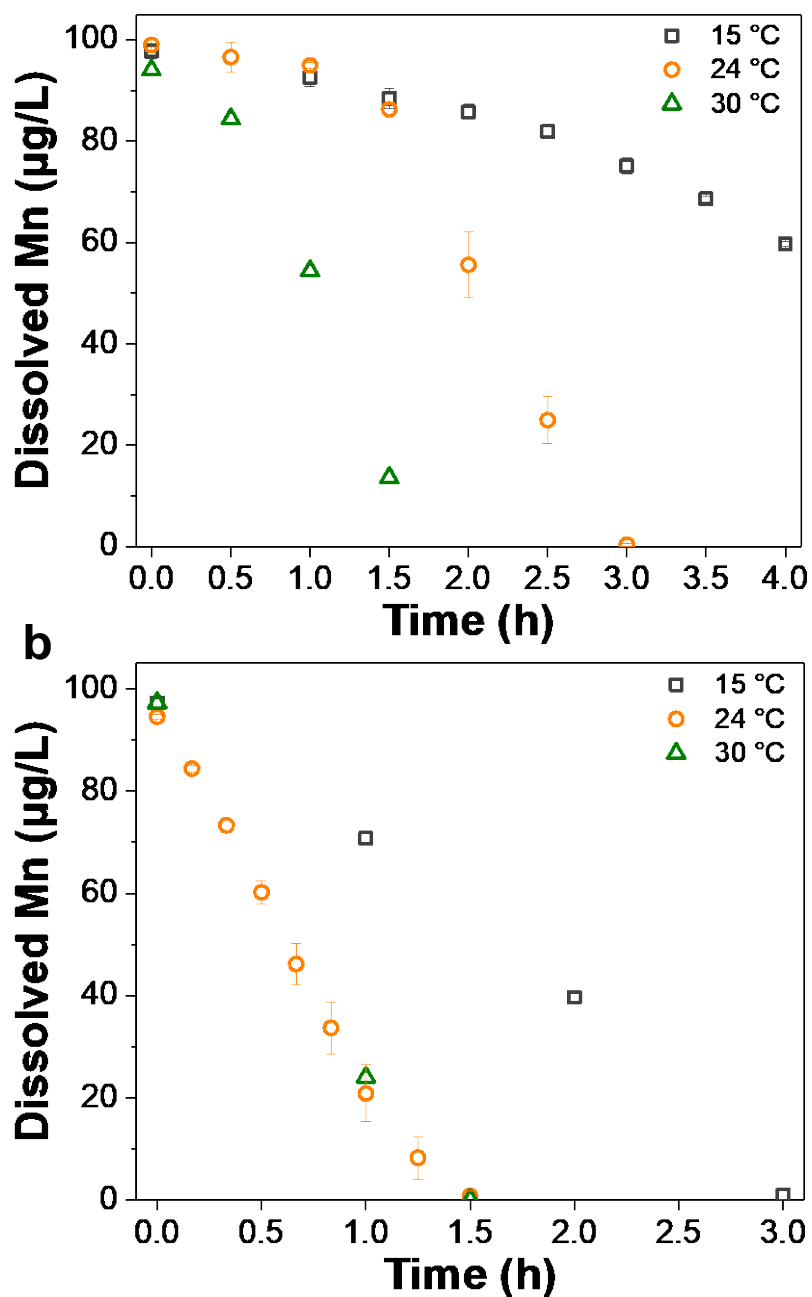

**Figure S13.** Effect of temperature on Mn(II) oxidation by chlorine in the presence of (a) 100 µg/L Cu(II) (added as CuSO<sub>4</sub>) and (b) 100 mg/L CuO, respectively. Other experimental conditions: NaCl = 1.0 mM, Mn(II) = 100 µg/L, Cl<sub>2</sub> = 1.0 mg/L, pH = 7.7 ± 0.1, open to air. The error bars are the standard deviations of duplicate experiments.



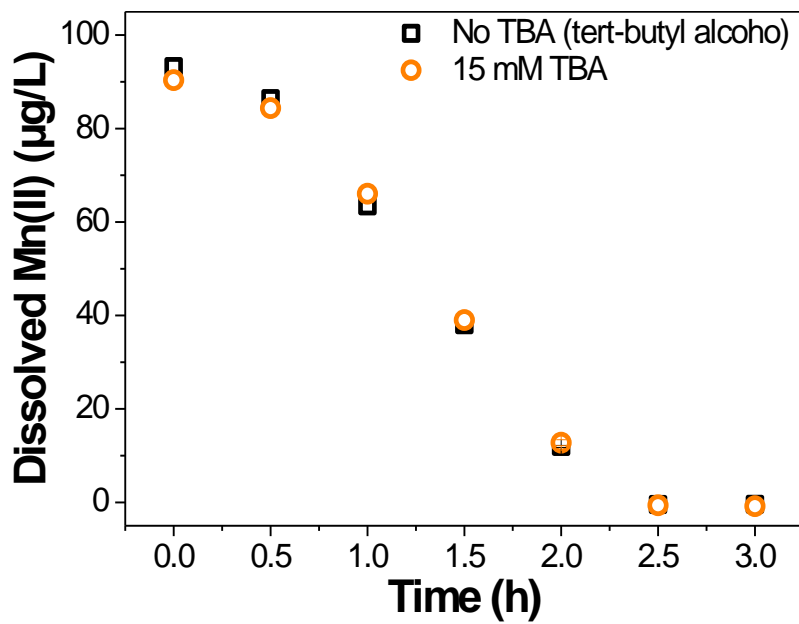

Figure S14. Effect of TBA on Mn(II) oxidation in the presence of  $100\ \mu\text{g/L}$  Cu(II),  $1.0\ \text{mg/L}$   $\text{Cl}_2$  at pH 7.7. Other conditions: NaCl =  $1.0\ \text{mM}$ , open to air.
